# Supplementary material for: Programmed DNA variability as a general evolutionary principle: insights from analysis of PE_PGRS genes in Mycobacterium tuberculosis
Source: Research Square preprint supplement (doi:10.21203/rs.3.rs-7880908/v1), 2025-10-28
Supplement: Supplementary file 2 [file af0177334d8e0dc7a5597fb4.docx]

Supplementary Table S1. Representative hairpin secondary structures at mutation sites across different genes and taxa

| Gene | Genome | | | | | Mutation | | | Hairpin secondary structures |
| --- | --- | --- | --- | --- | --- | --- | --- | --- | --- |
| Hairpin secondary structures at mutation sites in PE_PGRS genes | | | | | | | | | |
| PE_PGRS7 | Mtb H37Rv vs 4860 (CP053092.1) | | | | | A680G | | | 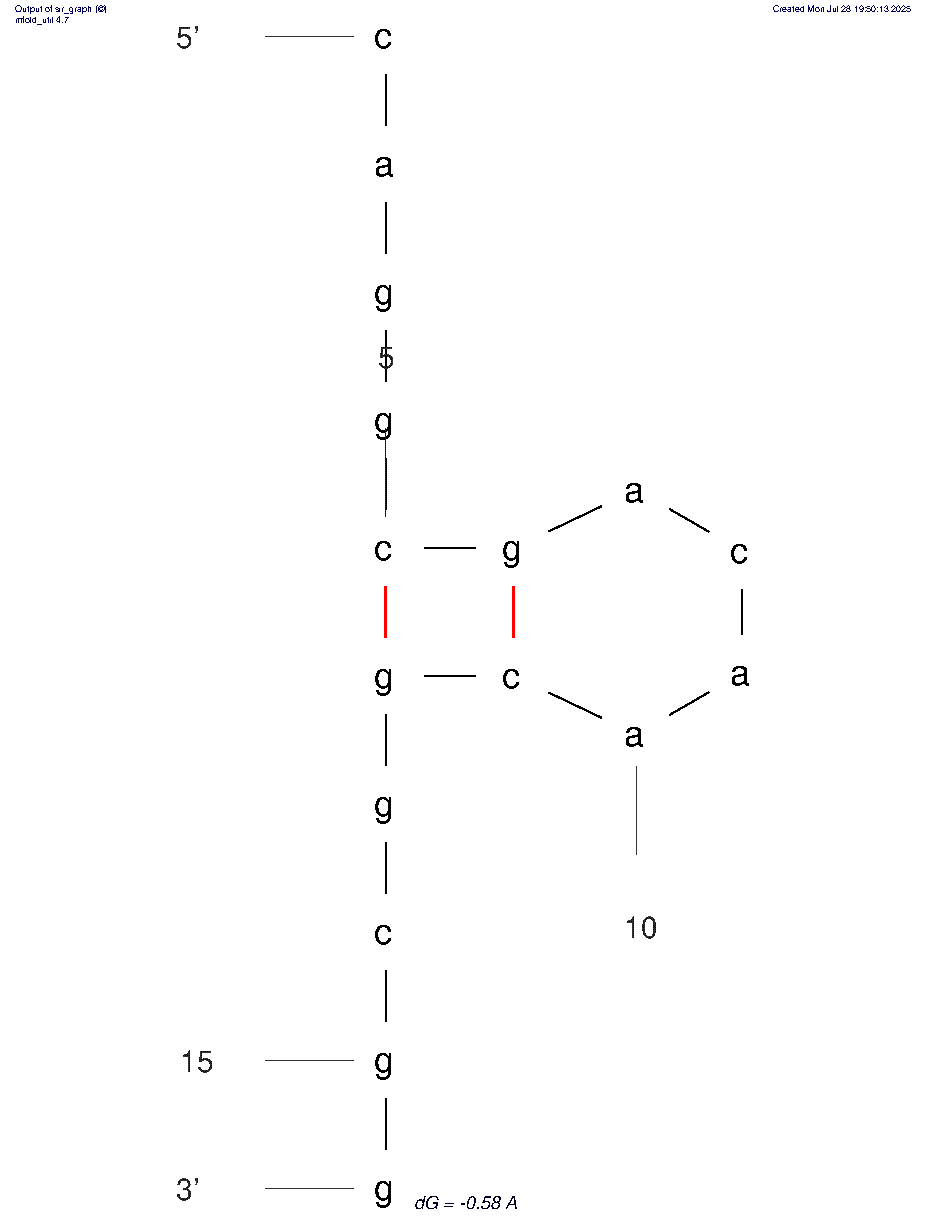 |
| ΔG (kcal/mol) | | ΔH  (kcal/mol) | | | ΔS (cal/mol·K) | Tm (°C) | |
| –0.58 | | –25.60 | | | –80.67 | 44.2 | |
| Sequence (5'→3') | | | | | | | |
| ggcggcgcaggcgacaacggcgg | | | | | | | |
| PE_PGRS7 | Mtb H37Rv vs 4860 (CP053092.1) | | | | | C4T | | | A  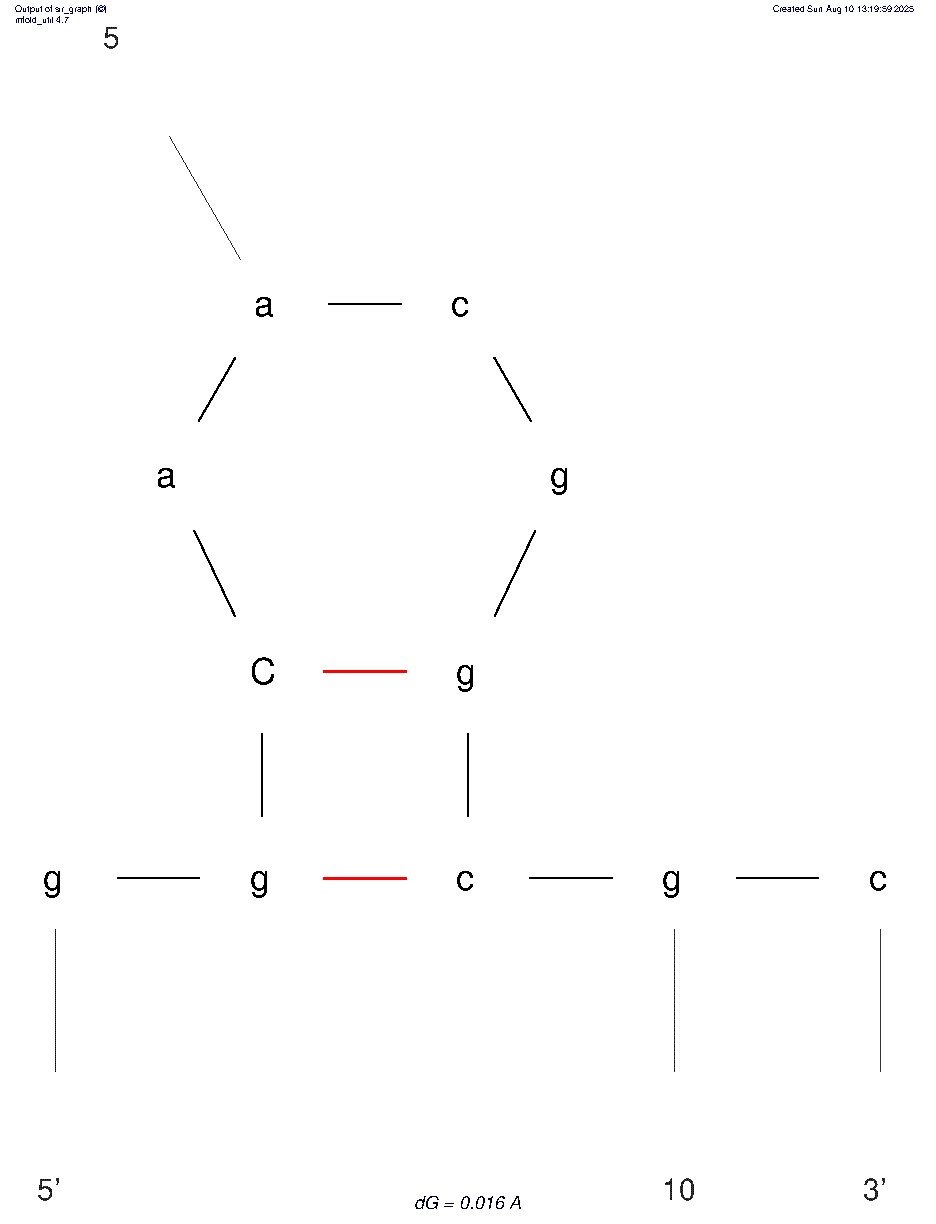  B  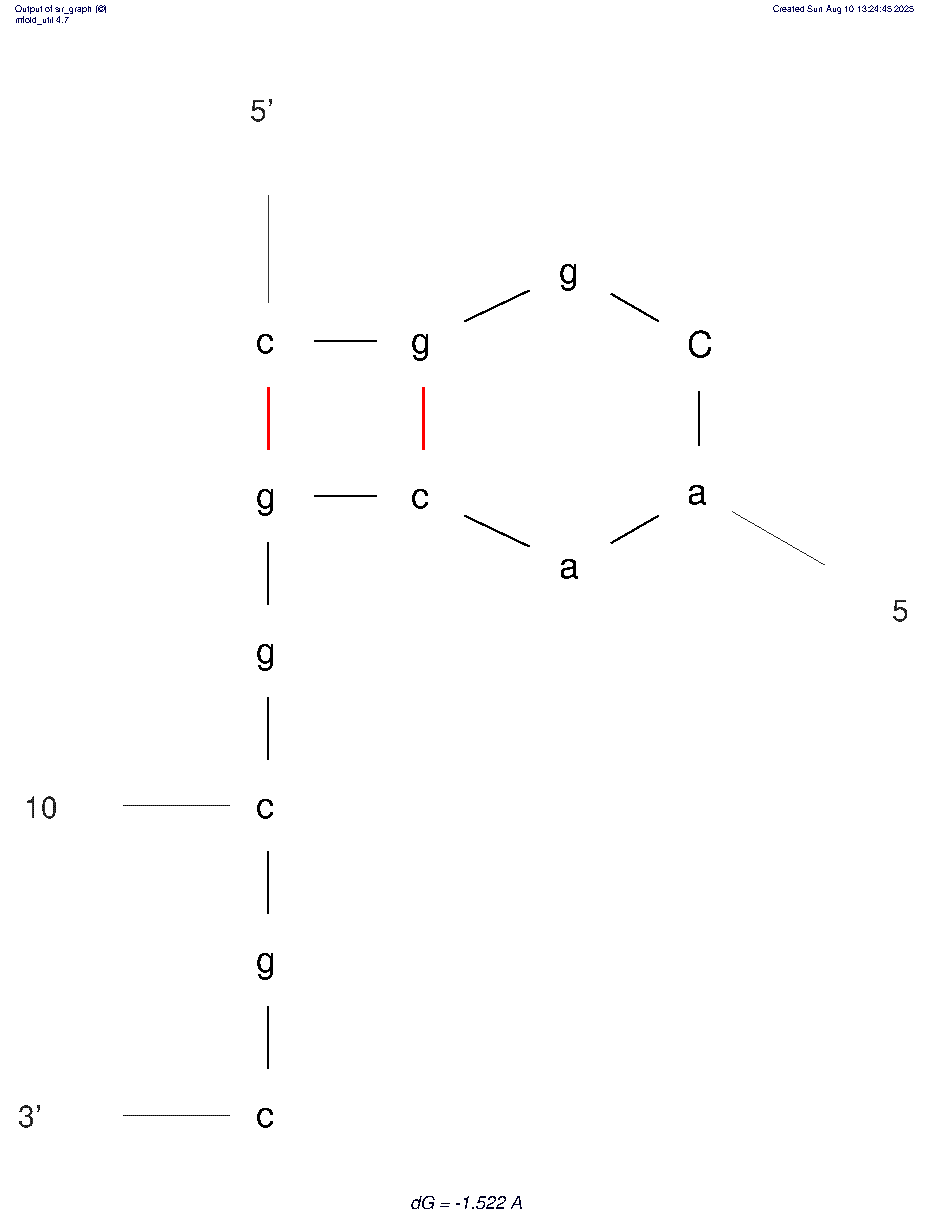 |
| ΔG (kcal/mol) | | ΔH  (kcal/mol) | | | ΔS (cal/mol·K) | Tm (°C) | |
| A - 0.01 | | 16.70 | | | -53.81 | 37.2°C | |
| B -1.52 | | - 20.10 | | | -59.91 | 62.4°C | |
| Sequence (5'→3') | | | | | | | |
| ccggCaacggcgccgacggggcggccggg | | | | | | | |
| PE_PGRS7 | Mtb H37Rv vs 4860 (CP053092.1) | | | | | A14T | | | 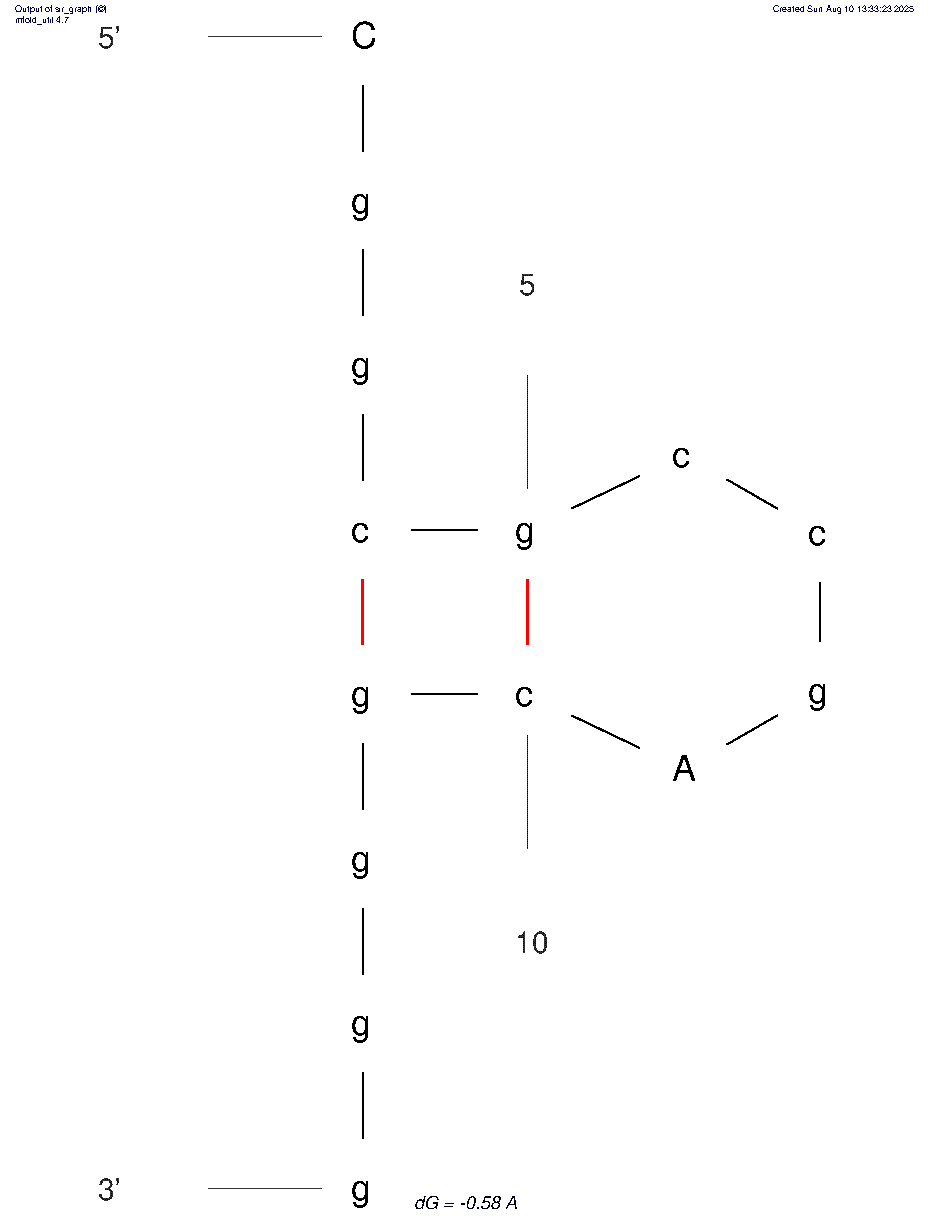 |
| ΔG (kcal/mol) | | ΔH  (kcal/mol) | | | ΔS (cal/mol·K) | Tm (°C) | |
| -0.58 | | -22.40 | | | -70.35 | 45.3°C | |
| Sequence (5'→3') | | | | | | | |
| CggcgccgAcgggg | | | | | | | |
| PE_PGRS7 | H37Rv vs Mtb 4860 (CP053092.1) | | | | | G45C | | | 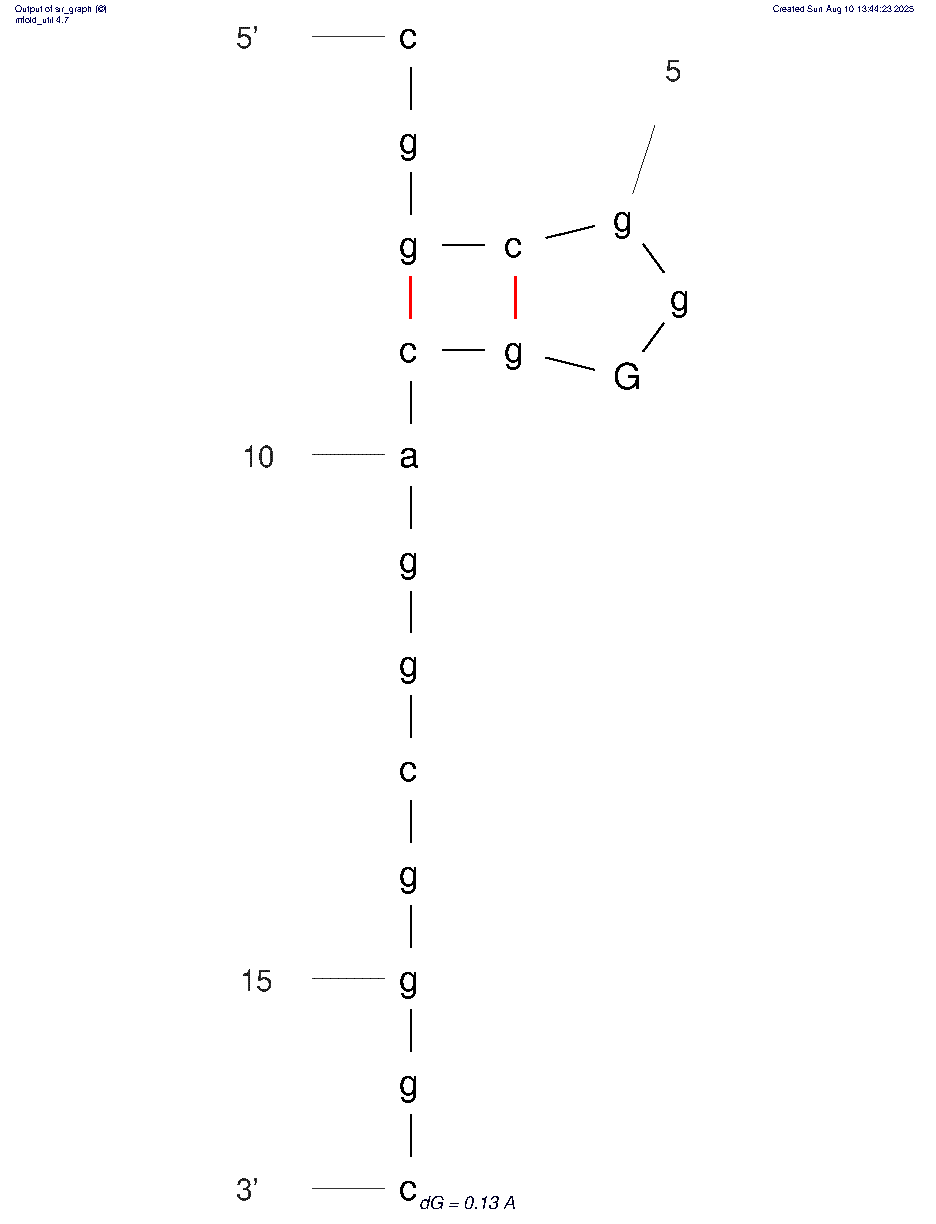 |
| ΔG (kcal/mol) | | ΔH  (kcal/mol) | | | ΔS (cal/mol·K) | Tm (°C) | |
| +0.13 | | -19.60 | | | -63.61 | 35.0°C | |
| Sequence (5'→3') | | | | | | | |
| cggcggGgcaggcgggc | | | | | | | |
| PE_PGRS7 | H37Rv vs Mtb 4860 (CP053092.1) | | | | | A48G  G50A | | | 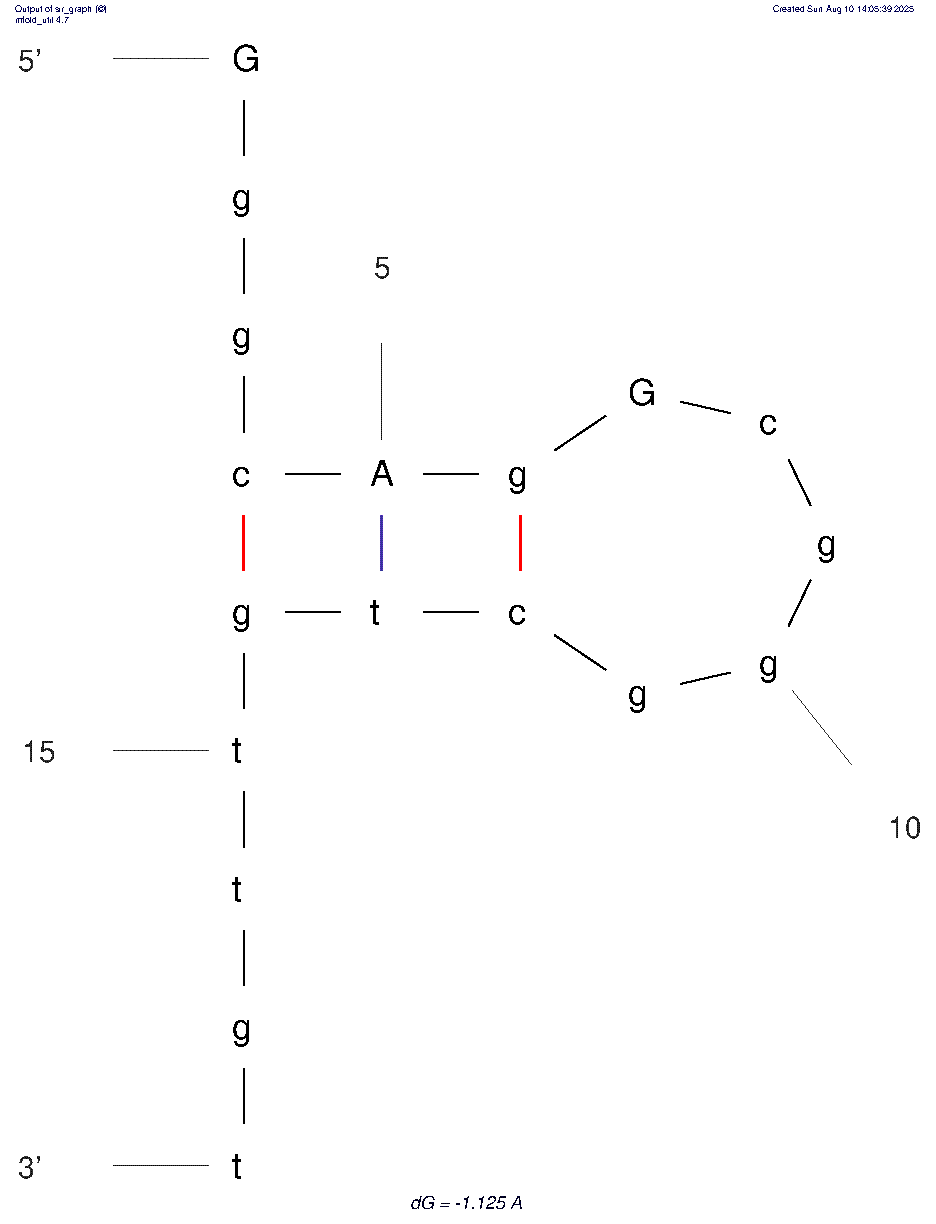 |
| ΔG (kcal/mol) | | ΔH  (kcal/mol) | | | ΔS (cal/mol·K) | Tm (°C) | |
| -1.12 | | -31.10 | | | -96.66 | 48.6°C | |
| Sequence (5'→3') | | | | | | | |
| GggcAgGcgggctgttgt | | | | | | | |
| PE_PGRS 53 | H37Rv vs *M. bovis* BCG Pasteur ATCC 35734  CP109681.1 | | | | | G505A  G506T | | | 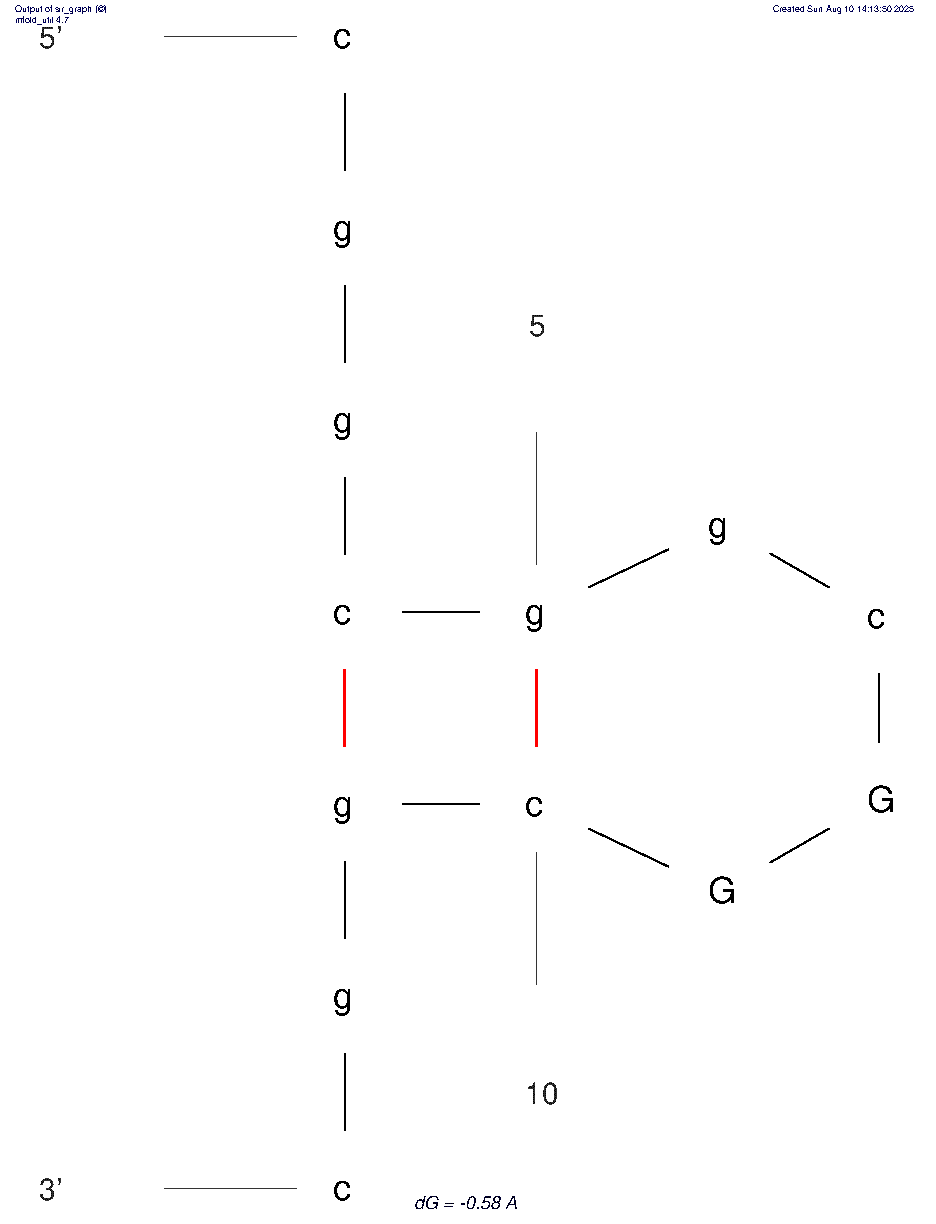 |
| ΔG (kcal/mol) | | ΔH  (kcal/mol) | | | ΔS (cal/mol·K) | Tm (°C) | |
| -0.58 | | -24.90 | | | -78.41 | 44.4°C | |
| Sequence (5'→3') | | | | | | | |
| ccggcggcGGcggcggggccggcgc  cggcggcGGcggc | | | | | | | |
| PE_PGRS 53 | | Mtb H37Rv vs M*. bovis* BCG Pasteur ATCC 35734  CP109681.1 | | | C210G, G213C, C216G | | | | 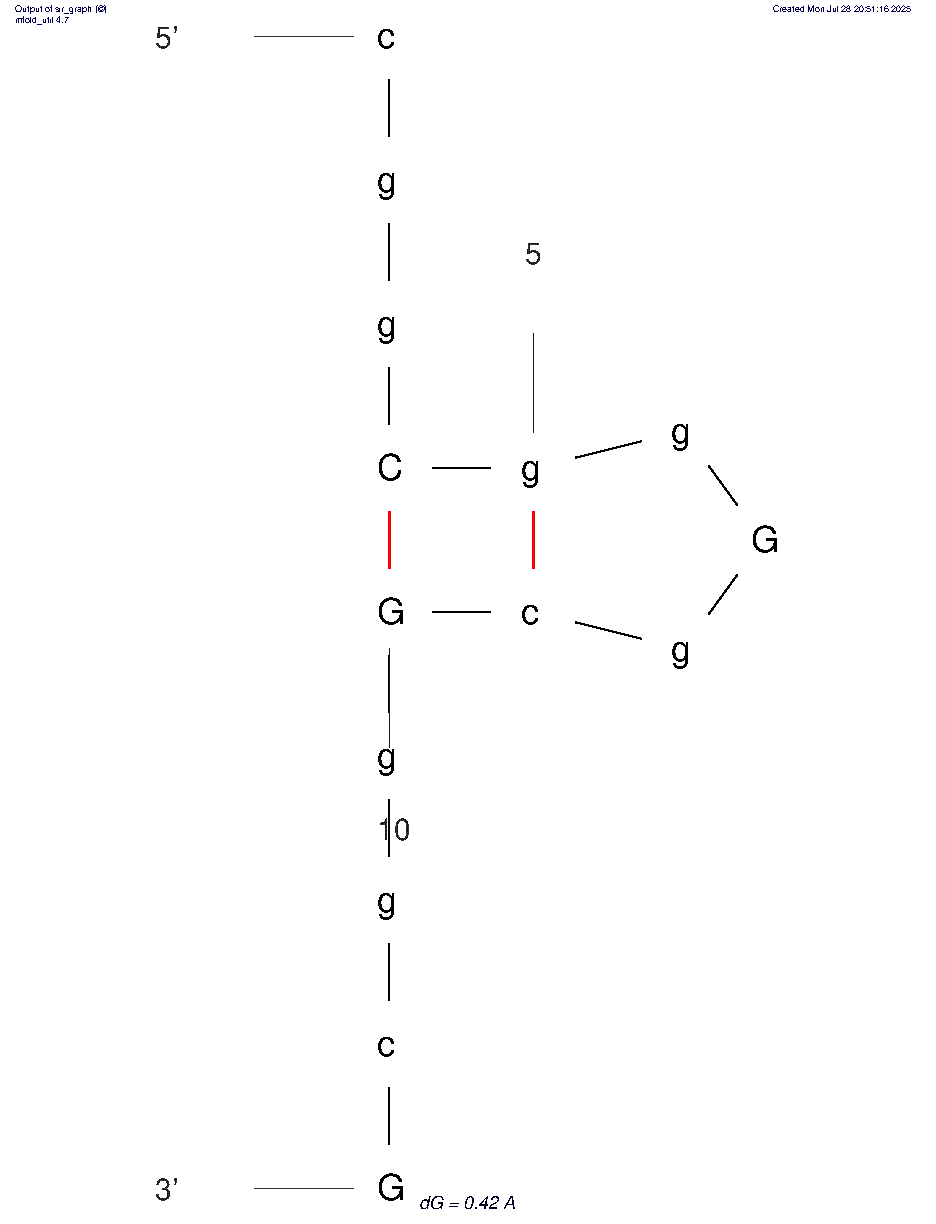 |
| ΔG (kcal/mol) | | ΔH  (kcal/mol) | ΔS (cal/mol·K) | | | Tm (°C) |
| +0.42 | | -19.60 | -64.55 | | | 30.5°C |
| Sequence (5'→3') | | | | | | |
| cggCggGgcGggcGc | | | | | | |
| PE_PGRS 53 | | H37Rv vs *M. bovis* BCG Pasteur ATCC 35734  CP109681.1 | | | C213G  G217A | | | | 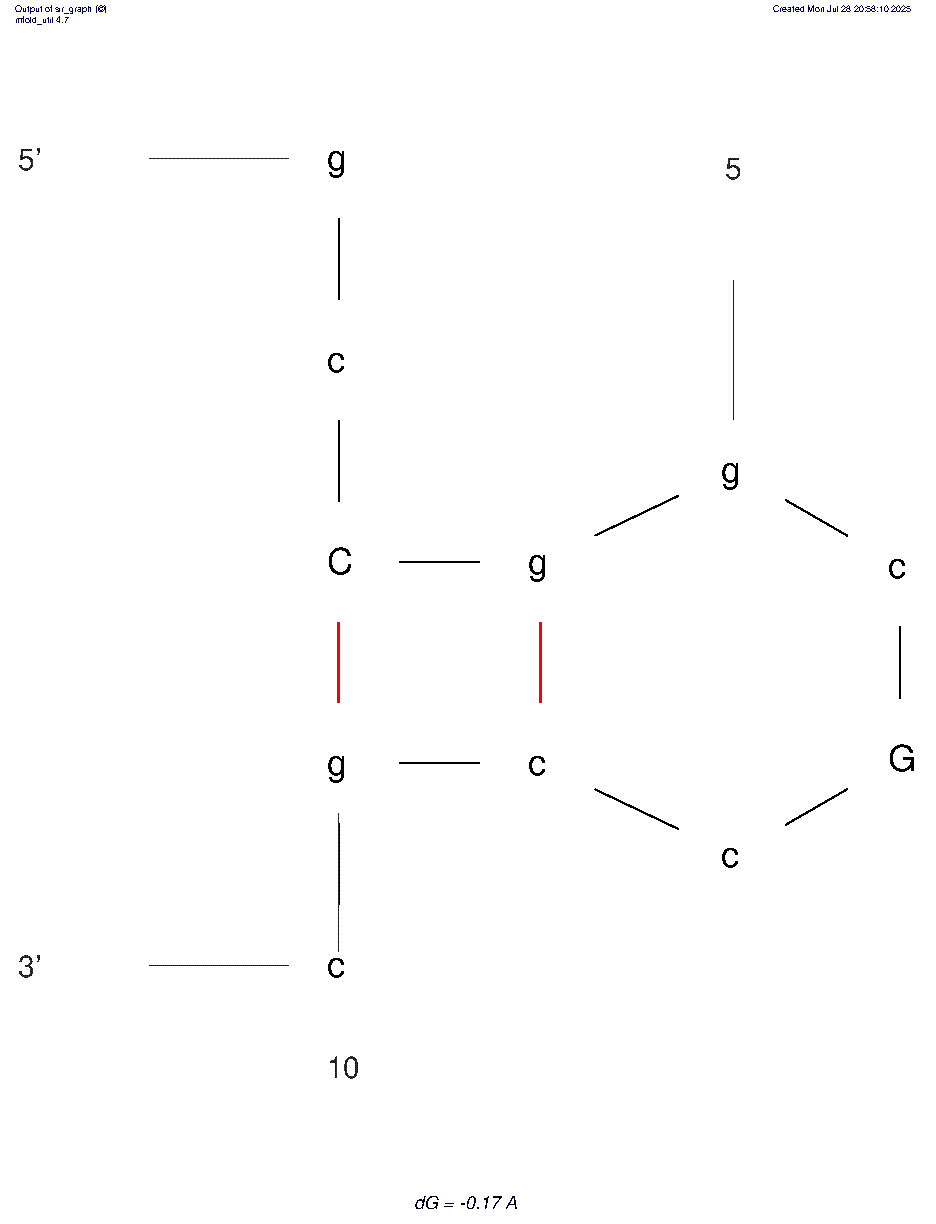 |
| ΔG (kcal/mol) | | ΔH  (kcal/mol) | ΔS (cal/mol·K) | | | Tm (°C) |
| -0.17 | | -22.20 | -71.03 | | | 39.4°C |
| Sequence (5'→3') | | | | | | |
| gcCggcGccgc | | | | | | |
| Hairpin secondary structures at mutation sites in ligD, ligB | | | | | | | | | |
| ligD | | Mtb H37Rv vs 4860 (CP053092.1) | | | TGC1030CGC | | | | 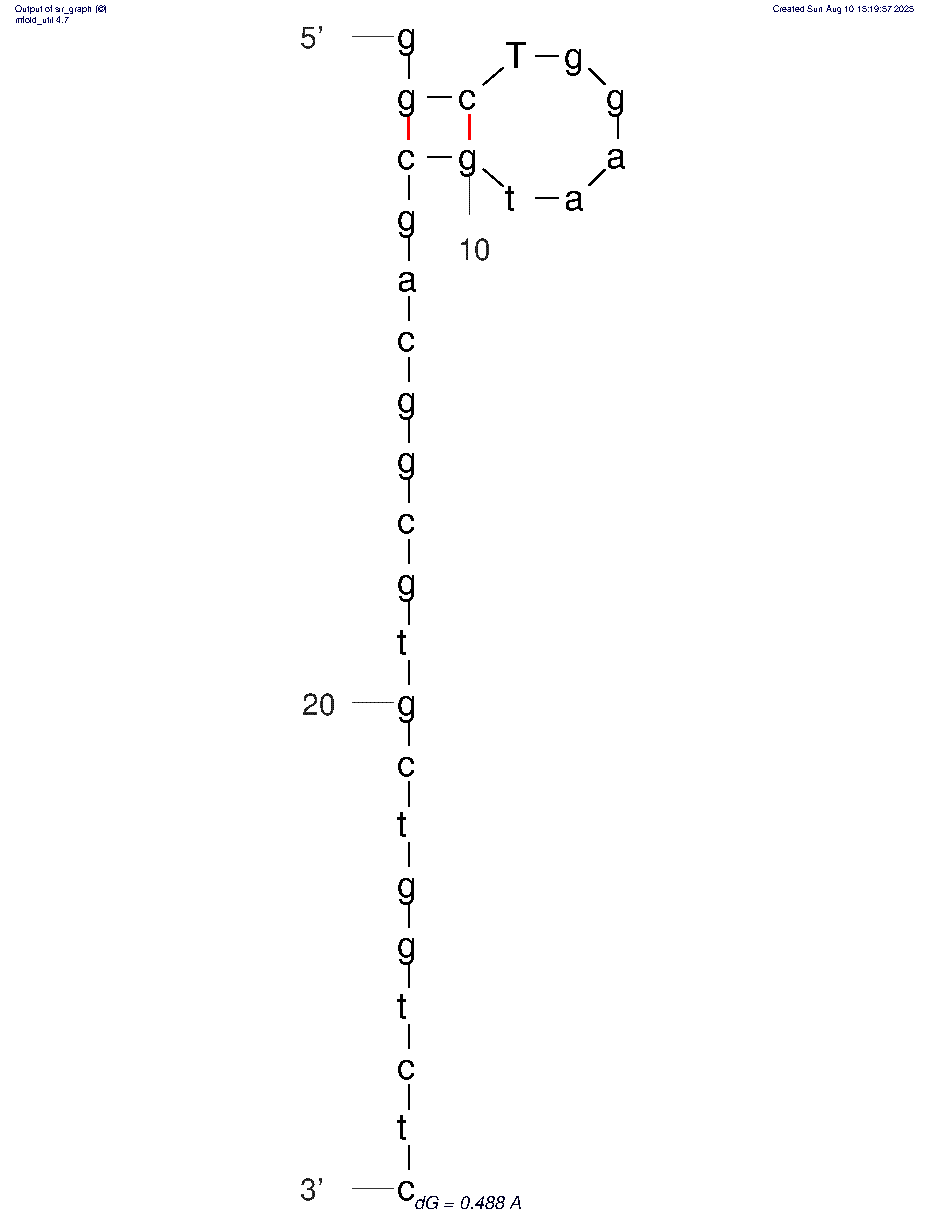 |
| ΔG (kcal/mol) | | ΔH  (kcal/mol) | ΔS (cal/mol·K) | | | Tm (°C) |
| -0.50 | | -18.50 | -58.04 | | | 45.6°C |
| Sequence (5'→3') | | | | | | |
| сggcTggaatgcgacggcgtgctggtctc | | | | | | |
| ligB | | Mtb H37Rv vs 4860 (CP053092.1) | | | CCG271TCG | | | | 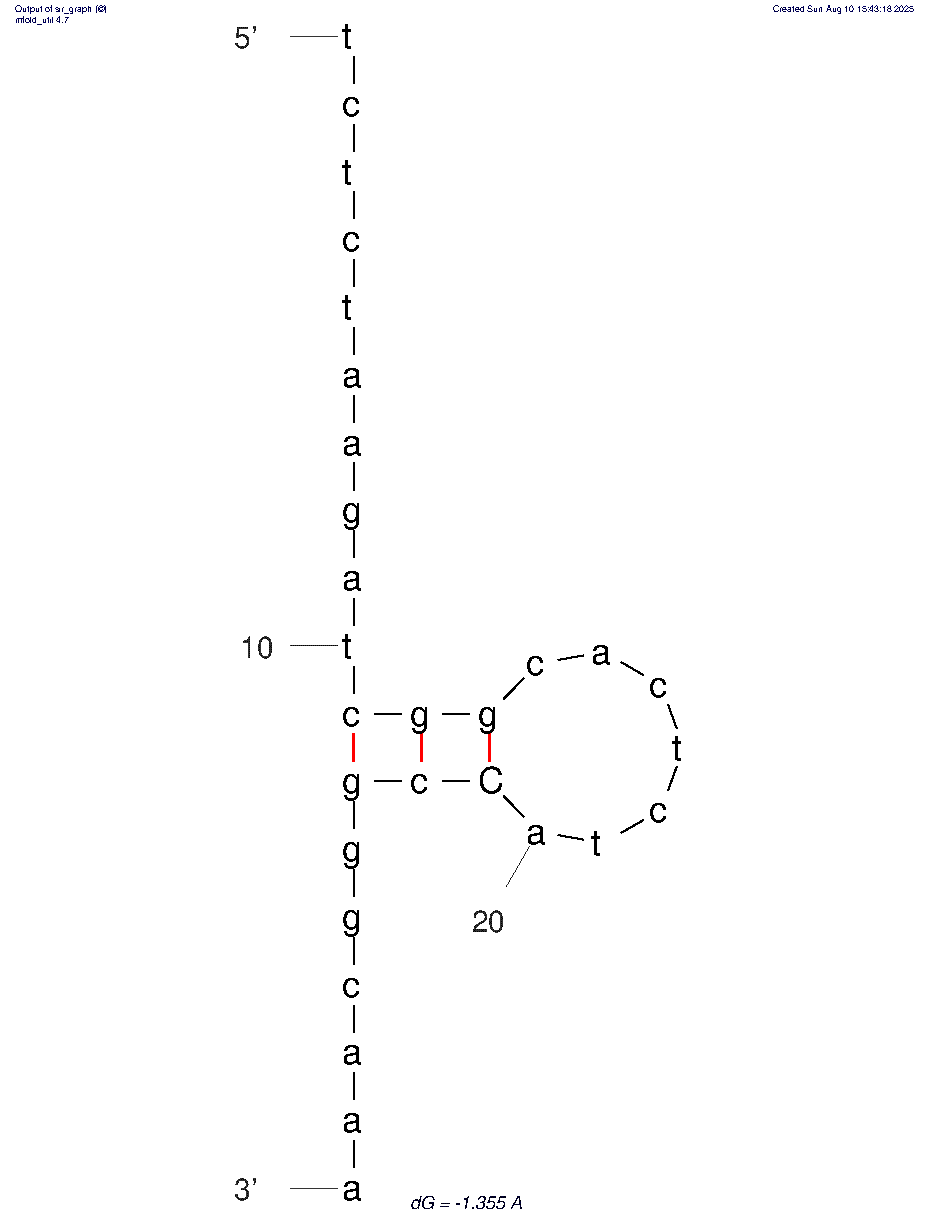 |
| ΔG (kcal/mol) | | ΔH  (kcal/mol) | ΔS (cal/mol·K) | | | Tm (°C) |
| -0.50 | | -18.50 | -58.04 | | | 45.6°C |
| Sequence (5'→3') | | | | | | |
| tctctaagatcggcactctaCcgggcaaa | | | | | | |
| Hairpin secondary structures at mutation sites in Human immunodeficiency virus type 1 (HXB2), HIV1/HTLV-III/LAV; GenBank: K03455.1 | | | | | | | | | |
| pol | | HIV1/HTLV-III/LAV;  GenBank: K03455.1 | | | **M184V**  ATG→GTG | | | | A  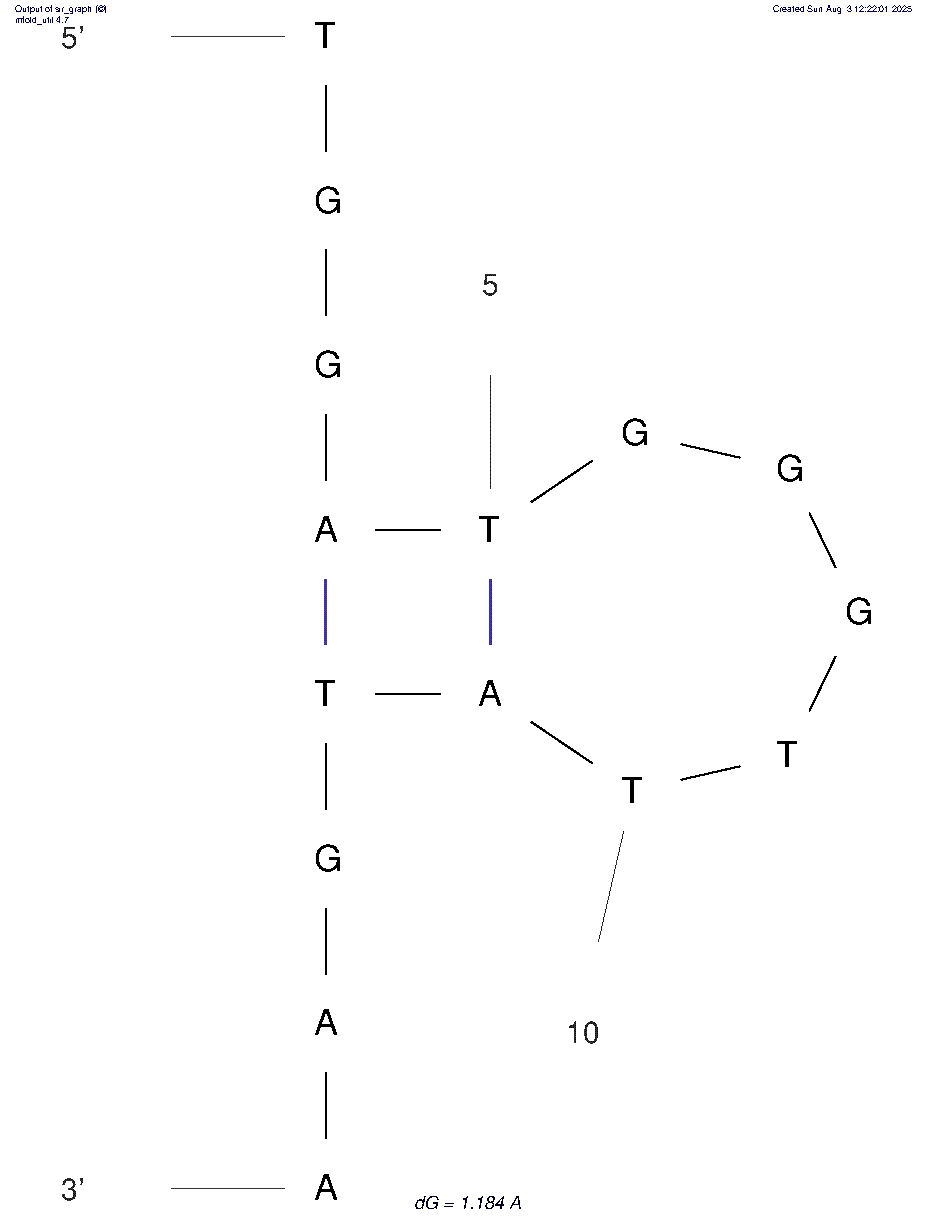  B  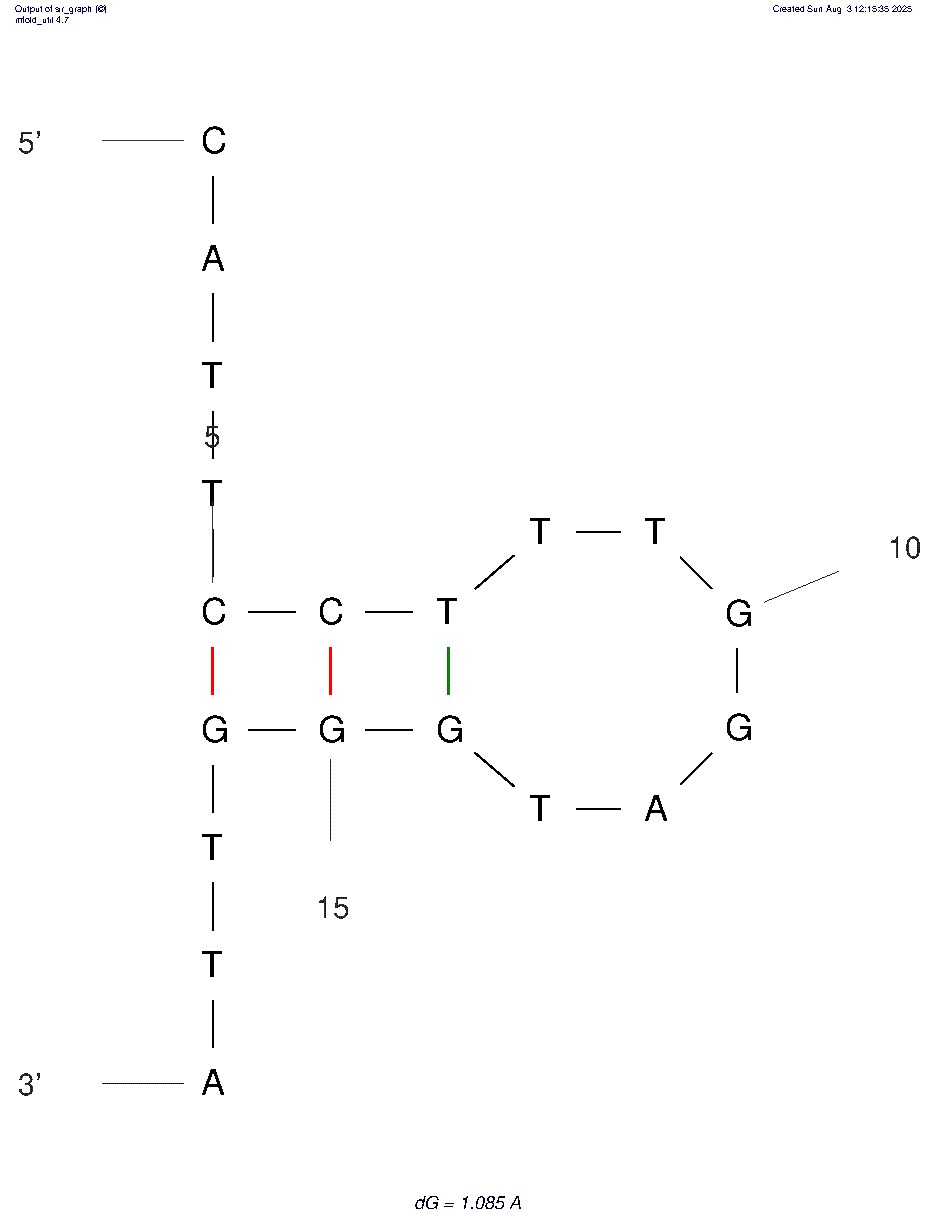 |
| ΔG (kcal/mol) | | ΔH  (kcal/mol) | ΔS (cal/mol·K) | | | Tm (°C) |
| A +1.18 | | -10.00 | -36.05 | | | 4.2°C |
| B +1.09 | | -19.20 | -65.42 | | | 20.3°C |
| Sequence (5'→3') | | | | | | |
| cattcctttggAtgggttatgaactccatcctgataaa  Atgggttatgaactccatcctgataaa | | | | | | |
| Hairpin secondary structures at mutation sites in SARS-CoV-2 (Gene ID: 43740568, NC_045512.2 (21563..25384)34, 35 | | | | | | | | | |
| S- Spike Protein | | SARS-CoV-2 (Gene ID: 43740568, NC_045512.2 (21563..25384) | | | D614 34, 35  A→G | | | | A  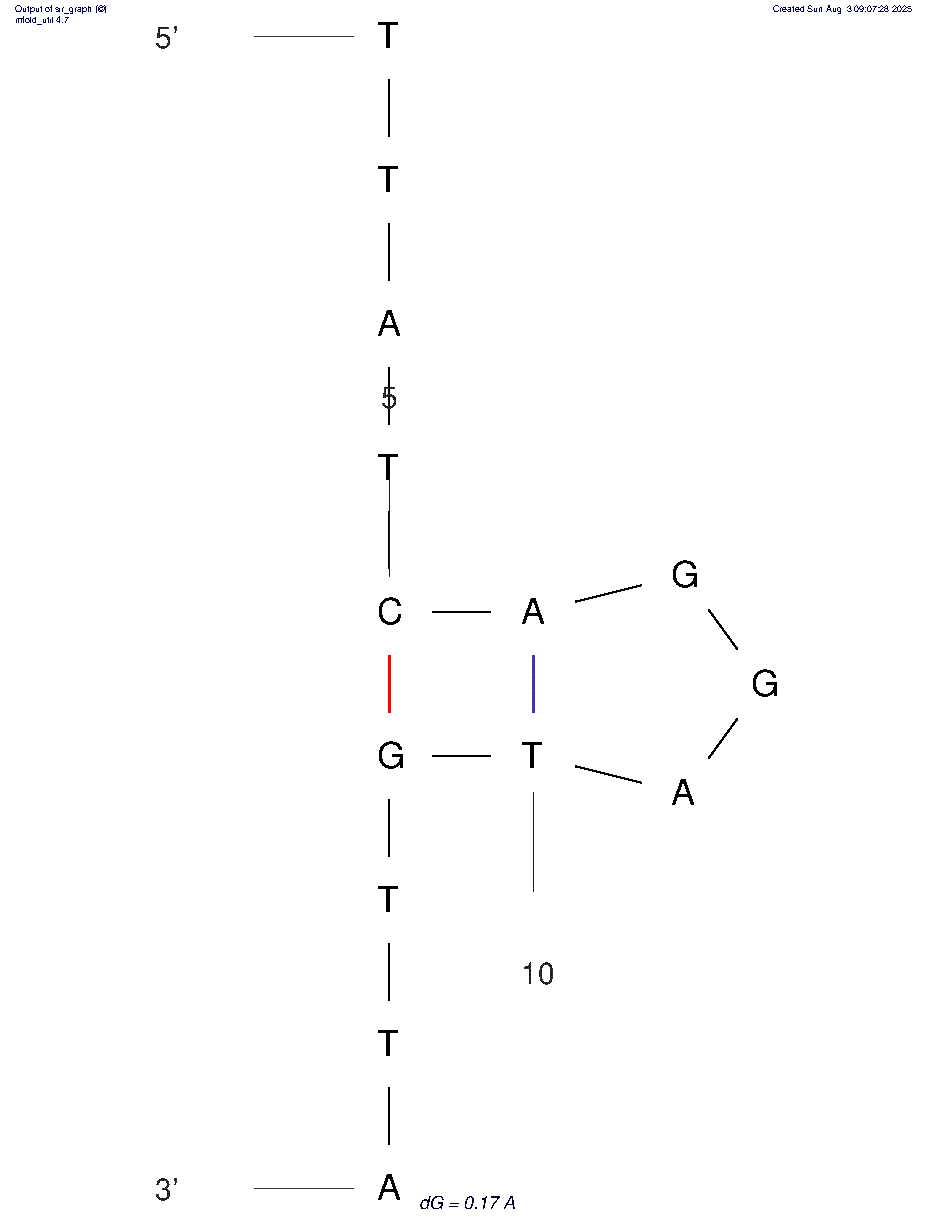  B  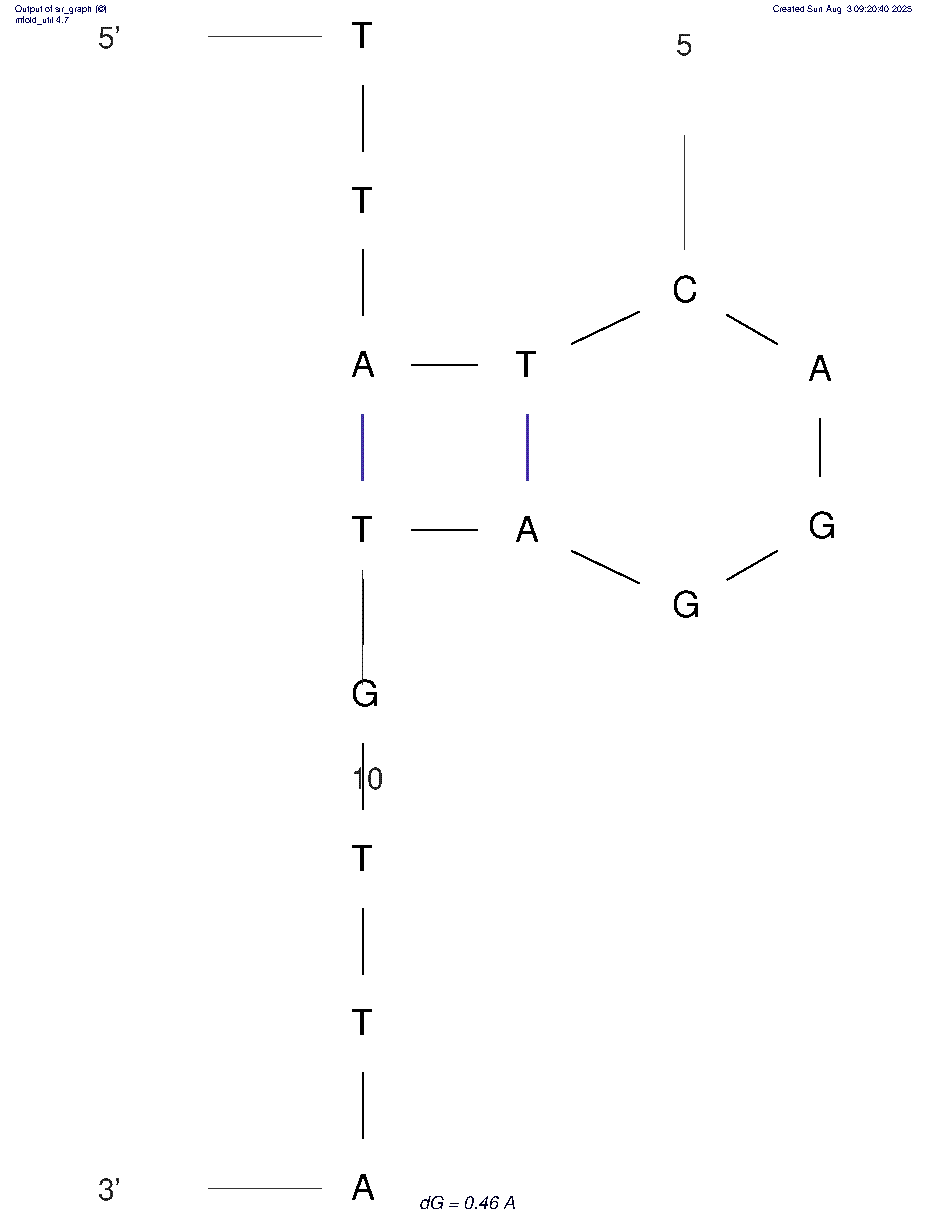 |
| ΔG (kcal/mol) | | ΔH  (kcal/mol) | ΔS (cal/mol·K) | | | Tm (°C) |
| A +0.17 | | -15.70 | -51.17 | | | 33.7°C |
| B +0.46 | | -19.50 | = -64.36 | | | 29.8°C |
| Sequence (5'→3') | | | | | | |
| caggAtgtt | | | | | | |
| S- Spike Protein | | SARS-CoV-2 (Gene ID: 43740568, NC_045512.2 (21563..25384) | | | 292 ALDP 29534, 35 | | | | A  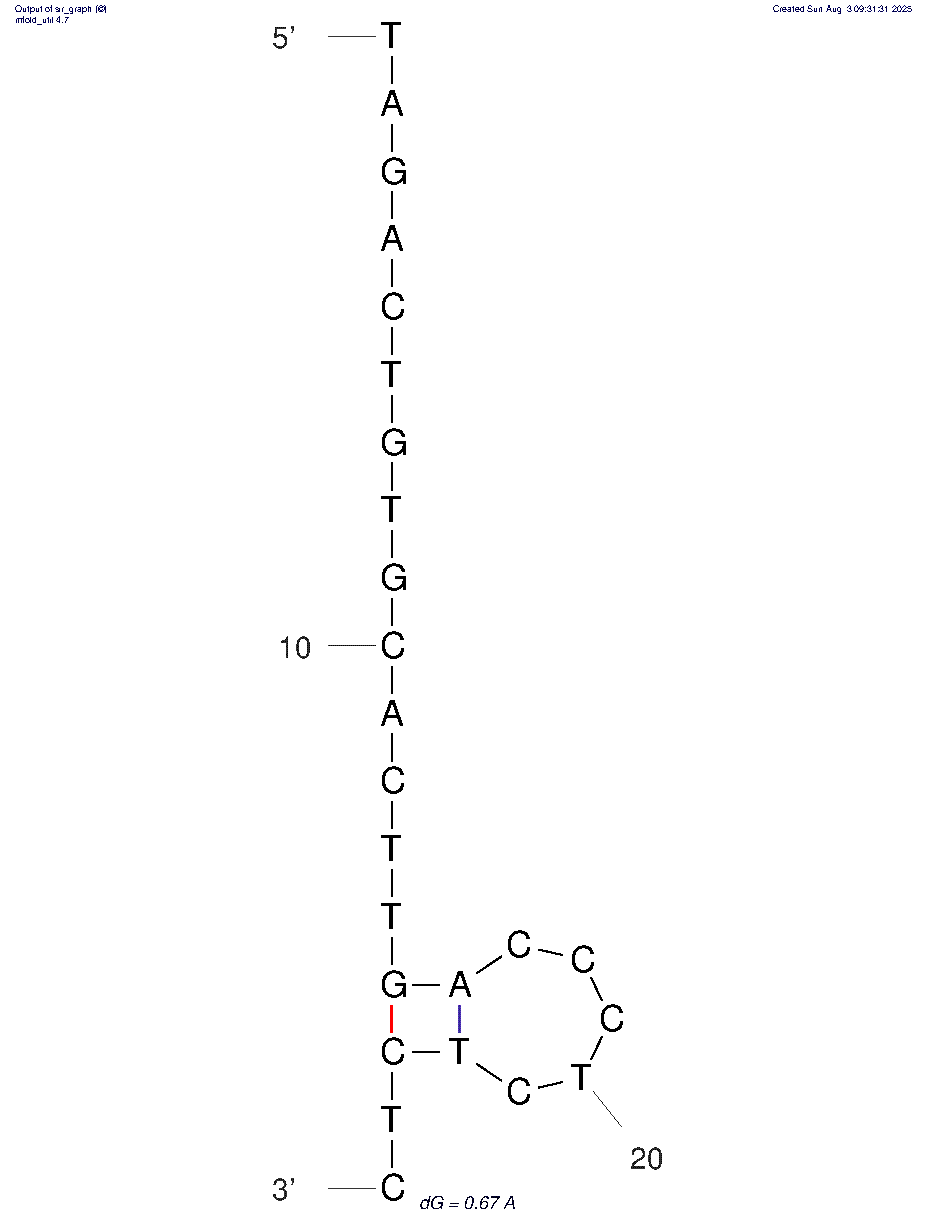  B  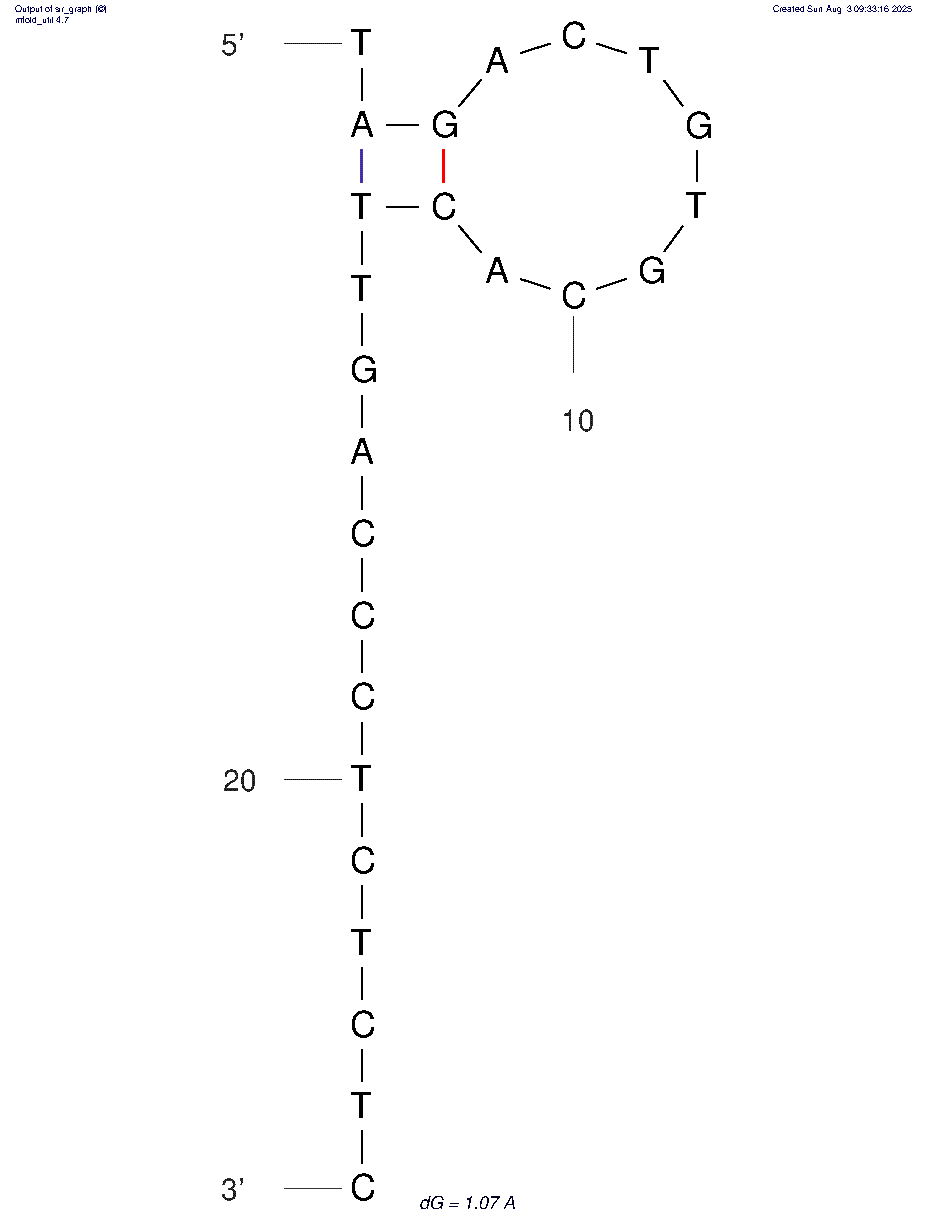 |
| ΔG (kcal/mol) | | ΔH  (kcal/mol) | ΔS (cal/mol·K) | | | Tm (°C) |
| A +0.67 | | -18.80 | -62.78 | | | 26.3°C |
| B +1.07 | | -15.60 | -53.75 | | | 17.1°C |
| Sequence (5'→3') | | | | | | |
| gCACTTGACCct | | | | | | |
| S- Spike Protein | | SARS-CoV-2 (Gene ID: 43740568, NC_045512.2 (21563..25384) | | | L54W  Ttg→tgg34, 35 | | | | 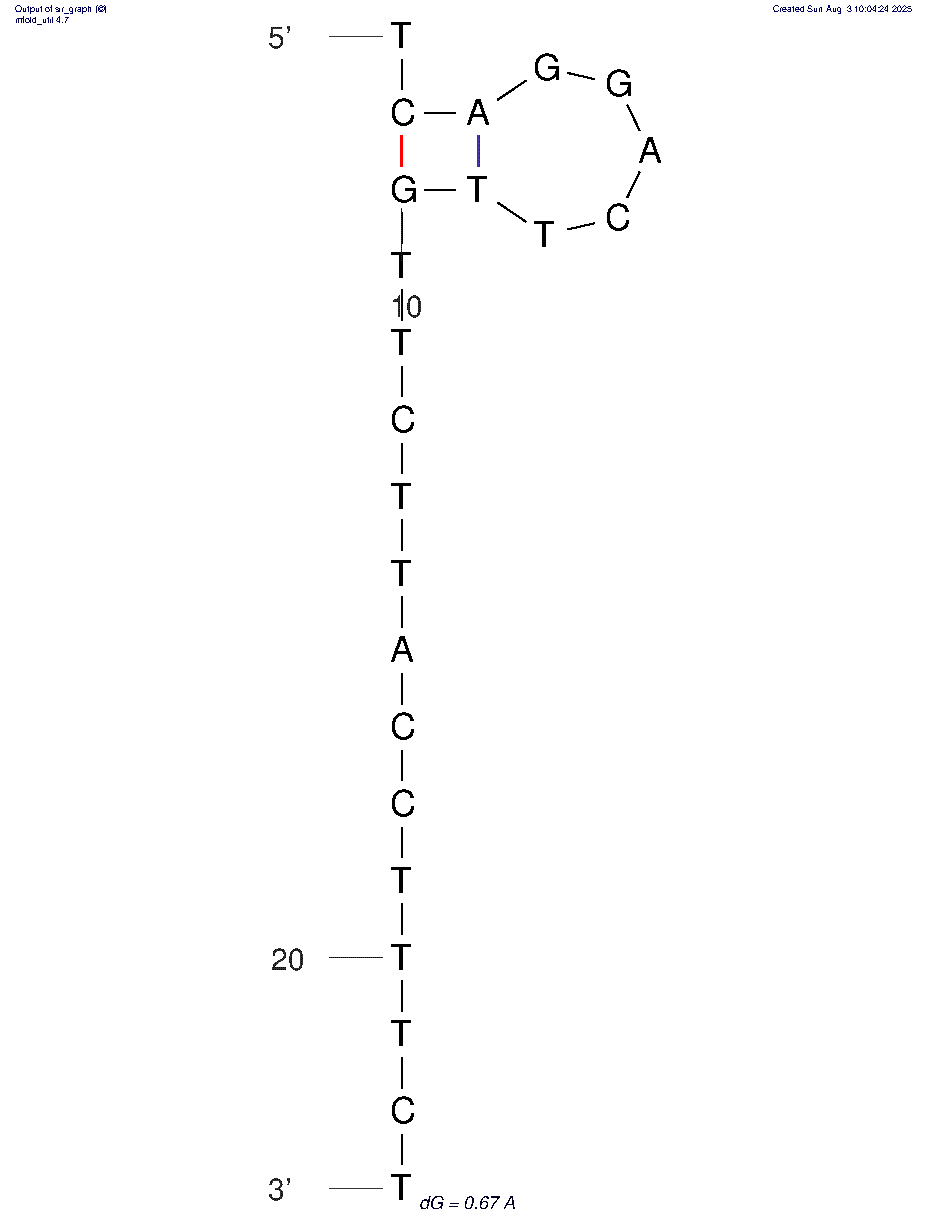 |
| ΔG (kcal/mol) | | ΔH  (kcal/mol) | ΔS (cal/mol·K) | | | Tm (°C) |
| -0.00 | | -16.10 | -51.91 | | | 37.0°C |
| Sequence (5'→3') | | | | | | |
| gactTgTtctta | | | | | | |
| S- Spike Protein | | SARS-CoV-2 (Gene ID: 43740568, NC_045512.2 (21563..25384) | | | F55I  Ttc→atc 34, 35 | | | | 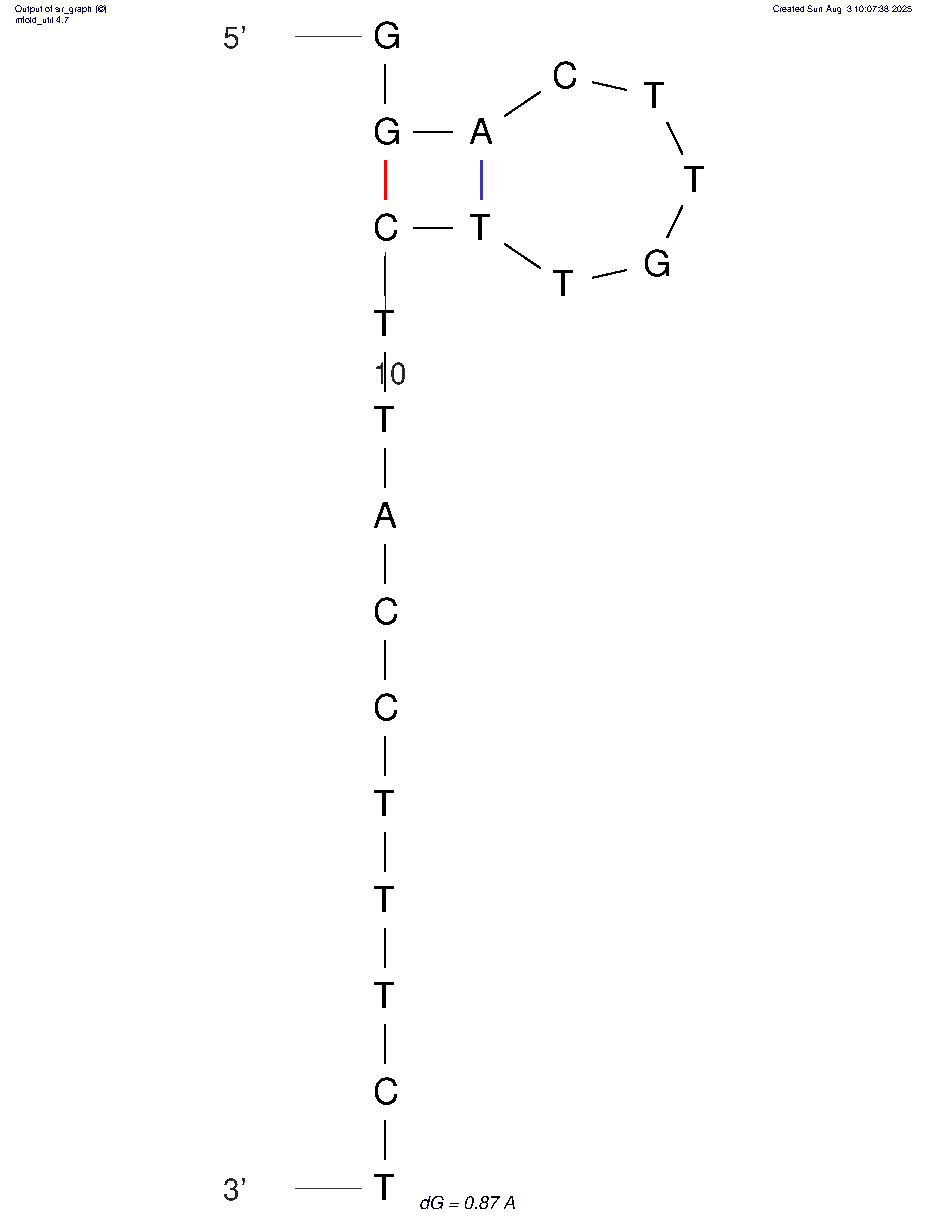 |
| ΔG (kcal/mol) | | ΔH  (kcal/mol) | ΔS (cal/mol·K) | | | Tm (°C) |
| +0.87 | | -18.50 | -62.45 | | | 23.1°C |
| Sequence (5'→3') | | | | | | |
| gactTgTtctta | | | | | | |
| Hairpin secondary structures at “malignant” mutation sites in Human BRCA1:BRCA1 DNA repair associated | | | | | | | | | |
| BRCA1:BRCA1 DNA repair associated | | NM_007294.4(BRCA1) | | | c.181T>G (p.Cys61Gly) | | | | 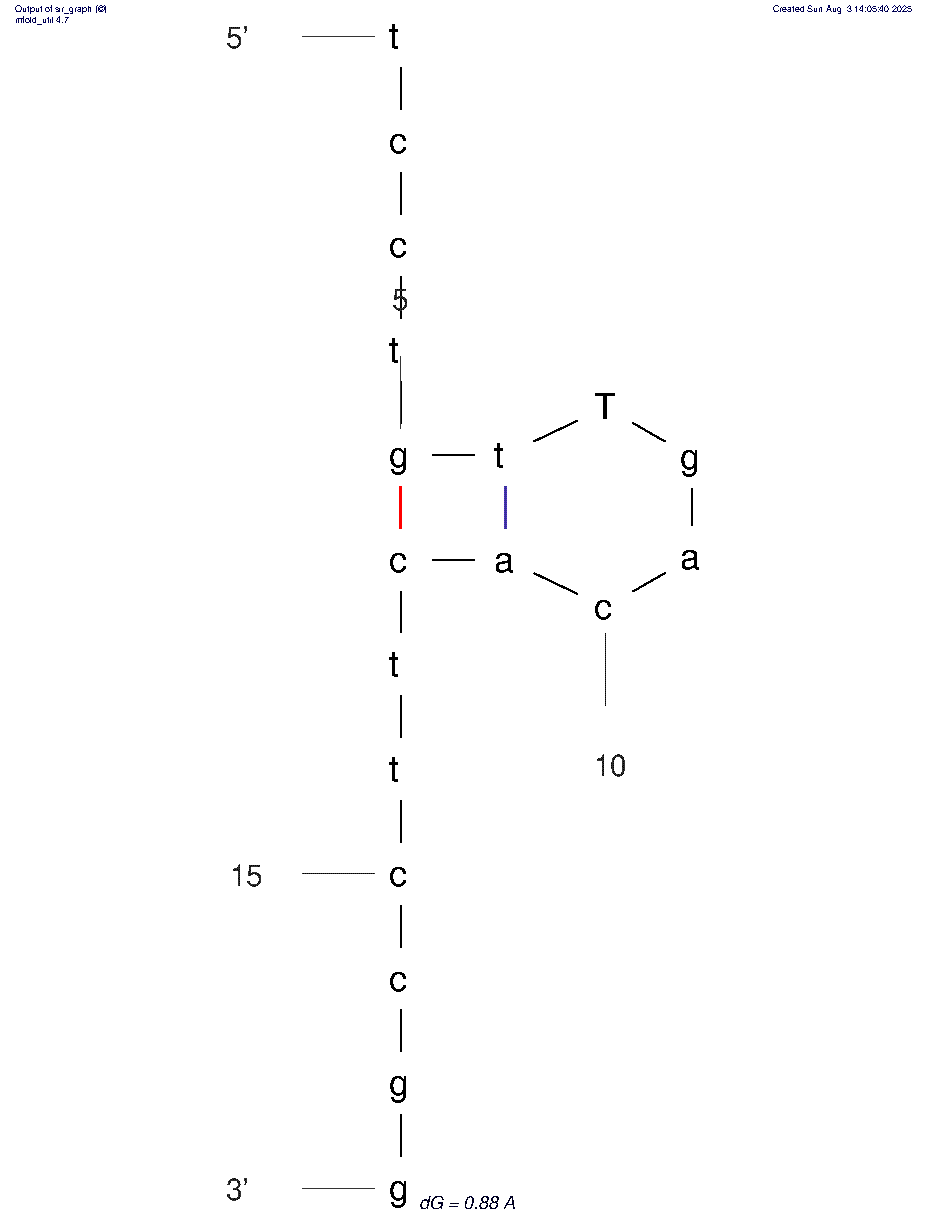  (reverse) |
| ΔG (kcal/mol) | | ΔH  (kcal/mol) | ΔS (cal/mol·K) | | | Tm (°C) |
| +0.88 | | -19.90 | -67.00 | | | 23.9°C |
| Sequence (5'→3') | | | | | | |
| AccagaagaaagggccttcacagTtgtcctttatgtaagaa | | | | | | |

**Supplementary Table S2 | Thermodynamic stability of secondary structures formed by oligonucleotides with different stem compositions (stems indicated in brackets)**

| **Sequence** | **Tetramer** | **ΔG (kcal/mol)** | **ΔH (kcal/mol)** | **ΔS (cal/mol·K)** | **Tm (°C)** |
| --- | --- | --- | --- | --- | --- |
| AA[CGGC]ACCA[GCCG]AA | CGGC  GCCG | –4.33 | –39.60 | –113.72 | 75.1 |
| AA[CGGC]ACCA[GCC]AA | CGGC  GCC | –1.77 | –30.50 | –92.63 | 56.1 |
| AA[CGGG]ACCA[CCCG]AA | CGGG  CCCG | -3.93 | 41.00 | -119.5 | 69.9 |
| AA[GGGC]ACCA[GCCC]AA | GGGC  CCCG | -3.52 | -38.20 | -111.82 | 68.5° |
| AA[CGGC]ACCA[CCG]AA | CGCG  CCG | –2.62 | –29.80 | –87.64 | 66.9 |
| CAA[GGG]ACCA[CCC]AAG  AA[GGG]ACCA[CCC]AA | GGG | -0.81 | –31.60 | -99.27 | 53.6 |
| AA[GGG]ACGCGTACA[CCC]AA (longer loop) | GGG  CCC | –1.11 | –31.60 | –98.31 | 45.2°C |
| AA[GGGG]ACCA[CCCC]AA | GGGG  CCCC | -3.12 | -39.60 | -117.62 | 63.5 |
| CAA[CGG]ACCA[CCG]AAG | CGG  CCG | -2.42 | 33.00 | 98.60 | 61.5 |
| CAA[CGG]ACCA[CCG]AAG | CGG  CCG | -2.01 | -30.20 | -90.89 | 59.1 |
| A[CTTC]ACCA[GAAG]A  (control) | CTTC  GAAG | -1.66 | -35.10 | -107.82 | 52.4 |

**Supplementary Table S3 | Mutator frequencies, CGGC abundance, and distribution of out-of-frame stop codons across bacterial species**

| Species | Frequency of mutators in the population (%) | CGGC abundance,  (%) | Out-of-frame stop codons  (1-nt indels, %) | Out-of-frame stop codons  (2-nt indels,%) |
| --- | --- | --- | --- | --- |
| *Escherichia*  *coli* | 0.5, 1.0, 1.9, 12.132 | 0.55 | 2.08 | 1.67 |
| *Salmonella*  *enterica* | 3.6 32 | 0.75*S.typhimurium*  0.73*S. typhi* | 1.9  1.92 | 1.61  1.62 |
| *Pseudomonas*  *aeruginosa* | 19.5, 30, 53.2, 54, 9232 | 1.79 | 0.18 | 0.98 |
| *Hemophilus*  *influenzae* | 2.4, 14.5 32 | 0.16 | 2.88 | 2.38 |
| *Neisseria*  *meningitidis* | 22.2, 56.8 32 | 1.11  1.06 | 1.70  1.15 | 1.48  1.44 |
| *Klebsiella*  *pneumoniae* | 14.5 32 | 1.07 | 1.47 | 1.47 |
| *Vibrio*  *parahaemolyticus* | 5.13, 0 32 | 0.27 | 2.33 | 2.07 |
| *Staphylococcus*  *aureus* | 1.4, 4, 14.6 32 | 0.07 | 3.66 | 2.96 |
| *Stenotrophomonas maltophilia* | 21.8 32 | 0.56 | 1.64 | 1.25 |

**Supplementary Table S4 |** List of 88 bacterial genomes, (74 species) included in the study, with corresponding GenBank accession numbers , (NCBI)

|  | Species | Accession code |
| --- | --- | --- |
|  | *Acinetobacter baumannii* | *CP043953.1* |
|  | *Actinomyces israelii strain F0345* | *CP124548.1* |
|  | *Actinomyces naeslundii strain FDAARGOS_1037* | *CP066049.1* |
|  | *Bacillus anthracis str. 'Ames Ancestor'* | *NC007530.2* |
|  | *Bacillus cereus strain FORC_047* | *CP017060.1* |
|  | *Bacteroides fragilis strain FDAARGOS_1225* | *CP069563.1* |
|  | *Bifidobacterium longum subsp. longum JCM 1217* | *NC015067.1* |
|  | *Bordetella parapertussis strain A005* | *CP025070.1* |
|  | *Bordetella pertussis strain H640* | *CP025371.1* |
|  | *Borrelia recurrentis* | *CP000993.1* |
|  | *Borrelia duttonii Ly* | *CP000976.1* |
|  | *Brucella abortus 2308* | *NC007624.1* |
|  | *Burkholderia cepacia strain BC16 chr. 1* | *CP045235.1* |
|  | *Burkholderia cepacia strain BC16 chr. 2* | *CP045236.1* |
|  | *Burkholderia mallei ATCC 23344 chr 2* | *CP000011.2* |
|  | *Burkholderia mallei ATCC 23344 chr. 1* | *CP000010.1* |
|  | *Campylobacter coli str. FDAARGOS_735* | *CP046317.1* |
|  | *Chlamydia pneumoniae Wien1* | *LN846980.1* |
|  | *Chlamydia trachomatis D/UW-3/CX* | *AE001273.1* |
|  | *Citrobacter freundii ATCC 8090* | *CP049015.1* |
|  | *Clostridioides difficile str. S-0253* | *CP076401.1* |
|  | *Clostridium botulinum str. 1169* | *CP013681.1* |
|  | *Corynebacterium diphtheriae str. NCTC11397* | *LN831026.1* |
|  | *Corynebacterium glutamicum ATCC 13032* | *BA000036.3.* |
|  | *Cronobacter sakazakii str. CS-931* | *CP027107.1* |
|  | *Cutibacterium acnes subsp. acnes NBRC 107605* | *AP01623.1* |
|  | *Desulfovibrio desulfuricans str. L4* | *CP072608.1* |
|  | *Eikenella corrodens str. NCTC10596* | *LT906482.1* |
|  | *Escherichia coli O157:H7 str. Sakai DNA* | *NC002695.2* |
|  | *Escherichia coli str. K-12 substr. MG1655* | *NC000913.3* |
|  | *Fusobacterium nucleatum subsp. nucleatum ATCC 25586* | *CP028101.1* |
|  | *Haemophilus influenzae str. FDAARGOS_1560* | *CP085952.1* |
|  | *Klebsiella oxytoca str. NCTC13727* | *LR134333.1* |
|  | *Klebsiella pneumoniae subsp. pneumoniae HS11286* | *CP003200.1* |
|  | *Klebsiella pneumoniae subsp. rhinoscleromatis str. KP4831* | *CP0962.1* |
|  | *Legionella pneumophila str. Philadelphia-1* | *CP013742.1* |
|  | *Leptospira interrogans serovar Copenhageni str. FDAARGOS_203* | *CP020414.2* |
|  | *Listeria monocytogenes EGD-e* | *NC003210.1* |
|  | *Metamycoplasma hominis str. FBG* | *CP055151.1* |
|  | *Moraxella catarrhalis str. CCRI-195ME* | *CP018059.1* |
|  | *Mycobacterium avium subsp. avium str. DSM 44156* | *CP046507.1* |
|  | *Mycobacterium chelonae CCUG 47445* | *CP007220.1* |
|  | *Mycobacterium intracellulare str. FDAARGOS_1564* | *CP085945.1* |
|  | *Mycobacterium kansasii ATCC 12478* | *CP006835.1* |
|  | *Mycobacterium leprae Kyoto-2 DNA* | *AP014567.1* |
|  | *Mycobacterium leprae str. MRHRU-235-G* | *NZ_CP029543.1* |
|  | *Mycobacterium marinum CCUG20998* | *CP024190.1* |
|  | *Mycobacterium tuberculosis str. 11502* | *CP070338.1* |
|  | *Mycobacterium tuberculosis str. 4860* | *CP053092.1* |
|  | *Mycobacterium tuberculosis str. 5005* | *CP049108.1* |
|  | *Mycobacterium tube* *NZ_CP029543.1rculosis str. BLR 4299 2019* | *CP125620.1* |
|  | *Mycobacterium tuberculosis str. BLR-31d* | *CP110674.1* |
|  | *Mycobacterium tuberculosis 9248* | *CP115447.1* |
|  | *Mycobacterium tuberculosis H37Rv* | *NC_000962.3* |
|  | *Mycobacteroides abscessus str. FLAC054* | *CP014961.1* |
|  | *Mycolicibacterium fortuitum subsp. fortuitum JCM6387* | *AP025518.1* |
|  | *Mycoplasma pneumoniae FH* | *CP010546.1* |
|  | *Neisseria meningitidis str. LNP24198* | *CP060280.1* |
|  | *Neisseria meningitidis str. PartJ-Nmeningitidis-RM8376* | *CP064367.1* |
|  | *Nocardia asteroides str. NCTC11293* | *LR134352.1* |
|  | *Porphyromonas gingivalis ATCC 33277* | *NC010729.1* |
|  | *Pseudomonas aeruginosa PAO1* | *NC002516.2* |
|  | *Pseudomonas fluorescens str. NCTC10038* | *LS483372.1* |
|  | *Rickettsia japonica YH* | *AP011533.1* |
|  | *Rickettsia prowazekii str. Breinl* | *CP004889.1* |
|  | *Rhodococcus erythropolis R138* | *CP007255.1* |
|  | *Salmonella enterica subsp. enterica serovar Typhi Ty2* | *AE014613.1* |
|  | *Salmonella enterica subsp. enterica serovar Typhimurium str. LT2* | *NC003197.2* |
|  | *Salmonella Typhimurium str. LT2* | *NC003197.2* |
|  | *Staphylococcus aureus str. BLR-DV* | *CP058312.1* |
|  | *Staphylococcus aureus subsp. aureus* | *NC007795.1* |
|  | *Staphylococcus epidermidis str. ATCC 14990* | *CP035288.1* |
|  | *Staphylococcus haemolyticus str. ATCC 620* | *CP035291.1* |
|  | *Staphylococcus saprophyticus subsp. saprophyticus ATCC 15305* | *NC007350.1* |
|  | *Stenotrophomonas maltophilia NCTC10257* | LT906480.1 |
|  | *Streptococcus agalactiae str. NGBS128* | *CP012480.1* |
|  | *Streptococcus mutans str. FDAARGOS 1458* | *CP077404.1* |
|  | *Streptococcus pneumoniae str. NCTC7465* | *LN831051.1* |
|  | *Streptococcus pyogenes str. NCTC12064* | *LS483338.1* |
|  | *Streptomyces griseus str. NBC_01018* | *CP108682.1* |
|  | *Treponema pallidum subsp. pallidum str. TpN-CL5* | *CP095416.1* |
|  | *Treponema denticola ATCC 35405* | *NC_002967.9* |
|  | *Thermus aquaticus Y51MC23* | *CP010822.1* |
|  | *Veillonella parvula DSM 2008* | *CP001820.1* |
|  | *Vibrio cholerae str. RFB16 chr. 2* | *CP043556.1* |
|  | *Vibrio cholerae str. RFB16 chr. 1* | *CP043554.1* |
|  | *Vibrio parahaemolyticus RIMD 2210633 DNA chr.1* | *BA000031.2* |
|  | *Vibrio parahaemolyticus RIMD 2210633 DNA chr.2* | *BA000032.2* |
