# Supplementary material for: Programmed DNA variability as a general evolutionary principle: insights from analysis of PE_PGRS genes in Mycobacterium tuberculosis
Source: Research Square preprint supplement (doi:10.21203/rs.3.rs-7880908/v1), 2025-10-28
Supplement: Supplementary file 3 [file da8ecc0cde184c86c05bef24.docx]

**Suppl. Fig. S1.** A single-nucleotide insertion in the PE_PGRS 12 gene (Fig. S1A) of M. tuberculosis strain 5005 (CP049108.1) causes a frameshift mutation, leading to the loss of the canonical stop codon and elongation of the translated protein from 138 amino acids (Fig. S1B), as in M. tuberculosis H37Rv, to 380 amino acids (Fig. S1C). The newly formed stop codon is marked with an asterisk). Indels in gene PE_PGRS 12 in vaccine strain M. bovis BCG 35734 (CP109681.1) result in elongation of peptide to the full length.
