# Supplementary material for: Programmed DNA variability as a general evolutionary principle: insights from analysis of PE_PGRS genes in Mycobacterium tuberculosis
Source: Research Square preprint supplement (doi:10.21203/rs.3.rs-7880908/v1), 2025-10-28
Supplement: Supplementary file 4 [file dd844e9a1babe591be8f815d.docx]

**Supplementary Table S1 |** **Representative hairpin secondary structures at mutation sites across different genes and taxa**

The table presents representative examples of predicted hairpin secondary structures encompassing mutation sites in bacterial, viral, and human genes. For each example, the mutation position, nucleotide change, predicted free energy (ΔG), melting temperature (Tm), and structural localization of the mutation are indicated

**Supplementary Table S2 | Thermodynamic stability of secondary structures formed by oligonucleotides with different stem compositions (stems indicated in brackets)**

The thermodynamic comparison of hairpin-forming oligonucleotides with different stem compositions presented in Supplementary Table 1 demonstrates that the CGGC motif forms the most stable hairpin among all tested sequences, showing the lowest Gibbs free energy (ΔG = –4.33 kcal/mol) and the highest Tm values, followed by CGGG, CGCG, GGG, GGGG, and the non-GC-rich controls. These stronger interactions in the CGGC stem potentially enable more pronounced energy redistribution during replication, which may lead to nucleotide misincorporation. These observations support a model in which mutagenesis is driven by structurally constrained, physicochemically mediated interactions rather than by stochastic errors alone.

**Supplementary Table S3 | Mutator frequencies, CGGC abundance, and distribution of out-of-frame stop codons across bacterial species**

Data in Supplementary Table S3 compare the abundance of CGGC tetramers and out-of-frame pre-stop codons controlling 1-nt and 2-nt frameshift robustness with the frequency of mutator strains 32 in bacterial populations. Species with higher mutator frequencies tend to have increased CGGC content and reduced pre-stop codon levels, such as *Pseudomonas aeruginosa* (19.5–92%)32, and *Neisseria meningitidis* (22.2–56.8%)32. In contrast, species with low mutator rates, including *Staphylococcus aureus* (1.4–14.6%)32, and *Vibrio parahaemolyticus* (0–5.1%)32, display lower CGGC levels and higher pre-stop codon abundance

**Supplementary Table S4 |** List of 88 bacterial genomes, (74 species) included in the study, with corresponding GenBank accession numbers, (NCBI)
